# **A single night in hypoxia either with or without ketone ester ingestion reduces sleep quality without impacting next day exercise performance**

1 **Myrthe Stalmans<sup>1</sup>, Domen Tominec<sup>2</sup>, Robberechts Ruben<sup>1</sup>, Wout Lauriks<sup>1</sup>, Monique**  
2 **Ramaekers<sup>1</sup>, Tadej Debevec<sup>2,3</sup>, Chiel Poffé<sup>1,4</sup> #**

3 <sup>1</sup>Exercise Physiology Research Group, Department of Movement Sciences, KU Leuven,  
4 Leuven, Belgium

5 <sup>2</sup>Faculty of Sport, University of Ljubljana, Ljubljana, Slovenia

<sup>3</sup>Department of Automatics, Biocybernetics and Robotics, Jožef Stefan Institute, Ljubljana,  
Slovenia

<sup>4</sup>REVAL – Rehabilitation Research Center, Faculty of Rehabilitation Sciences, Hasselt  
University, Diepenbeek, Belgium

6 **#, Correspondence:** Chiel Poffé, REVAL – Rehabilitation Research Center, Faculty of  
7 Rehabilitation Sciences, Hasselt University, Wetenschapspark 7, 3590 Diepenbeek, Belgium

8 Email: [chiel.poffe@uhasselt.be](mailto:chiel.poffe@uhasselt.be)

9 **Running head:** Ketones do not impact sleep in hypoxia

10 **Keywords:** ketone; sleep; recovery; oxygen saturation; exercise performance; hypoxia

11 **ABSTRACT**

12 **Background:** Sleeping at (simulated) altitude is highly common in athletes as an integral  
13 part of altitude training camps or sport competitions. However, it is also often feared due to  
14 proclaimed negative effects on sleep quality, thereby potentially hampering exercise recovery  
15 and next-day exercise performance. We recently showed that ketone ester (KE) ingestion  
16 beneficially impacted sleep following strenuous, late evening exercise in normoxia, and  
17 alleviated hypoxemia. Therefore, we hypothesized that KE ingestion may be an effective  
18 strategy to attenuate hypox(em)ia-induced sleep dysregulations. **Methods:** Eleven healthy,  
19 male participants completed three experimental sessions including normoxic training and  
20 subsequent sleep in normoxia or at a simulated altitude of 3,000m while receiving either KE  
21 or placebo post-exercise and pre-sleep. Sleep was evaluated using polysomnography, while  
22 next-day exercise performance was assessed through a 30-min all-out time trial (TT<sub>30'</sub>).  
23 Physiological measurements included oxygen status, heart rate variability, ventilatory  
24 parameters, blood acid-base balance and capillary blood gases. **Results:** Hypoxia caused a  
25 ~3% drop in sleep efficiency, established through a doubled wakefulness after sleep onset and  
26 a ~22% reduction in slow wave sleep. KE ingestion alleviated the gradual drop in SpO<sub>2</sub>  
27 throughout the first part of the night, but did not alter hypoxia-induced sleep dysregulations.  
28 Neither KE, nor nocturnal hypoxia affected TT<sub>30'</sub> performance, but nocturnal hypoxia  
29 hampered heart rate recovery following TT<sub>30'</sub>. **Conclusion:** We observed that sleeping at  
30 3,000m altitude already impairs sleep efficiency. Although this hypoxia-induced sleep  
31 disruption was too subtle to limit exercise performance, we for the first time indicate that  
32 sleeping at altitude impairs next-day exercise recovery. KE alleviated nocturnal hypoxemia  
33 whenever SpO<sub>2</sub> values dropped below ~85%, but this did not translate into improved sleep or  
34 next-day exercise performance.

35 **Word count:** 273

## 36 INTRODUCTION

37 Sleeping at (simulated) altitude is highly common in athletes as an integral part of  
38 altitude training camps. However, athletes are also often enforced to sleep at altitude during  
39 major sport competitions such as grand tours in cycling, Olympic Games, multi-day  
40 ultrarunning races or mountaineering expeditions. During altitude training camps, nocturnal  
41 hypoxic exposure is considered essential for inducing favorable physiological adaptations in  
42 the longer term such as increased hemoglobin mass and maximal oxygen consumption rates  
43 which may ultimately improve endurance exercise performance (1). Conversely, sleeping at  
44 altitude is also often feared by athletes – especially during competitions – due to proclaimed  
45 negative effects of hypoxia on sleep quality which may in turn hamper exercise recovery and  
46 next-day exercise performance.

47 In this respect, studies generally observed that a single night at (simulated) altitudes  
48 above 2,000 m impairs sleep quality (2–10). This is evidenced by decreases in either rapid eye  
49 movement (REM) or slow wave sleep (SWS), or an increase in wakefulness during the night.  
50 Methodological heterogeneity and contradictory findings, however, hinder unequivocal  
51 conclusions and a clear rationale. In general, REM sleep is unaffected at altitudes up to  
52 3,800m (2, 4, 6, 7, 11–13) but decreases up to 40% at altitudes starting from 4,000m (3, 5, 9,  
53 10). Data on SWS is much more equivocal with some studies reporting no changes at altitudes  
54 up to 3,800m (7, 11, 12), while other studies reported decreases from ~20-45% at altitudes  
55 between 2,000 and 4,300m (2, 5, 6, 9, 13). This is generally accompanied by an increased  
56 wakefulness after sleep onset (WASO) (3–7, 9). Conversely, sleep efficiency typically  
57 remains unaffected by altitudes of up to 4,000m (2–4, 6, 7, 11–13), but decreases by 10-20%  
58 at 4,000m (3, 13) and higher (9).

59 Sleep disturbances may have both direct and indirect implications for athletic performance.  
60 This is evidenced by studies showing that a single night of restricted sleep (i.e., sleep time  
61 reduction of 2-4h) increases cardiac stress during and after exercise on the next day (14).  
62 Furthermore, ~5 days of disturbed sleep has been shown to suppress myofibrillar and  
63 sarcoplasmic protein synthesis rates (15, 16), to impair insulin sensitivity (17), and to reduce  
64 mitochondrial respiratory function (16). Although some studies reported no impact of sleep  
65 restriction down to 2h per night on next day exercise performance (14, 18), other studies  
66 indicated that a single night of ~2-3h sleep deprivation is sufficient to decrease 6s peak  
67 cycling power output and both 3 and 20 km cycling time-trial performance (19, 20).  
68 Nevertheless, it is currently unknown if the more subtle differences in sleep quality and  
69 quantity that are expected to occur upon a single night in hypoxia also impair next day  
70 exercise performance.

71 The precise underlying mechanisms of hypoxia-induced sleep impairments are currently  
72 unknown. Yet, they are most likely caused by hypoxemia (8, 12, 21, 22). Interestingly, we  
73 previously showed that increasing blood ketone bodies (KB), via oral ketone ester (KE)  
74 ingestion, attenuated the drop in blood (as well as muscle and brain) oxygenation after 3-4h in  
75 hypoxia (23, 24). Furthermore, we identified that KE intake post-exercise and pre-sleep  
76 beneficially impacted sleep following strenuous, late evening exercise in normoxic  
77 conditions. This was evidenced by an inhibition of late evening exercise-induced decreases in  
78 REM sleep and WASO, and a 2% improvement in sleep efficiency (25).

79 These data indicate that pre-sleep KE ingestion may be an effective strategy to attenuate  
80 hypox(em)ia-induced sleep dysregulations. Against this background, this study aims to  
81 identify the impact of a single night in hypoxia on (i) nocturnal sleep measured using golden  
82 standard polysomnography, and (ii) next day exercise performance, and to (iii) explore the

83 potential of KE supplementation to counteract potential performance or sleep dysregulations

84 under these conditions.

## 85 **METHODS**

86 *Ethical approval and participants.* This research was registered at [www.clinicaltrials.gov](http://www.clinicaltrials.gov)  
87 (NCT06060093) and approved by the Ethics Committee Research UZ/KU Leuven  
88 (B3222022001041). Potential participants were medically screened and provided written  
89 informed consents. Candidates' sleep quality was screened using the Pittsburgh Sleep Quality  
90 Index (PSQI) in order to guarantee adequate baseline sleep quality as defined by the National  
91 Sleep Foundation (i.e., sleep efficiency above 85%). Participants working in late-night shifts,  
92 as well as extreme morning and evening chronotypes as determined by the Horne-Östberg  
93 questionnaire were excluded. All thirteen healthy, male participants that were included  
94 reported good sleep quality and no indications for sleep disorders (PSQI score <5). None of  
95 them showed indications for psychological or neurological disorders, such as depression  
96 (Beck's Depression questionnaire) or anxiety (Beck's Anxiety questionnaire). All participants  
97 were active in cycling, endurance running or triathlon. Further exclusion criteria included  
98 smoking, exposure to altitudes >1,500m during the 3 months preceding the study or a history  
99 of altitude-sensitive pathologies. From the thirteen participants that were initially included,  
100 one dropped out due to a Covid-19 infection and another one was excluded from the data  
101 analyses due to a baseline sleep quality drastically below the predefined inclusion criteria  
102 (i.e., sleep efficiency of 78%). Therefore, data analyses were performed on 11 participants  
103 [age:  $24 \pm 4$  yr; height:  $181.3 \pm 7.5$  m; body mass:  $73.2 \pm 9.2$  kg; physical activity:  $8 \pm 3$   
104 h.week<sup>-1</sup>,  $V_{O_2\max}$ :  $61.5 \pm 8.8$  mL.kg<sup>-1</sup>.min<sup>-1</sup> (mean  $\pm$  SD)].

105 *General study design.* This randomized, double-blind, placebo-controlled, cross-over  
106 study consisted of three experimental sessions. These sessions were designed to mimic a live-  
107 high, train-low setup, and all included an identical training session in normoxia whereafter  
108 participants either spend the night in (i) normoxia (N<sub>PL</sub>) or (ii) normobaric hypoxia (~3,000m  
109 simulated altitude) while receiving a placebo (H<sub>PL</sub>), or in (iii) hypoxia while receiving KE

110 ( $H_{KE}$ , Fig. 1). Following the night in either hypoxia or normoxia, participants performed an  
111 all-out 30min time-trial ( $TT_{30'}$ ) to evaluate exercise performance. Physiological measurements  
112 were performed at rest throughout both days of the protocol. This design allowed us to  
113 evaluate both (i) the impact of sleeping in hypoxia vs. normoxia, and (ii) the potential of KE  
114 to improve sleep in hypoxia. All experimental sessions were conducted in a normobaric  
115 hypoxic facility (Van Amerongen CA Technology, Tiel, The Netherlands) at the Bakala  
116 Athletic Performance Center (Leuven, Belgium). The experimental sessions were separated  
117 by a one-week wash-out period, and experimental protocols and timings were identical for all  
118 three sessions.

119 *Preliminary testing and familiarization sessions.* Two weeks before the first  
120 experimental session, participants performed a familiarization session consisting of a graded  
121 exercise test on a cycling ergometer (Avantronic Cyclus II, Leipzig, Germany) to assess both  
122 their lactate threshold (LT) and maximal oxygen uptake rate ( $V\dot{V}O_{2max}$ ). For the LT  
123 determination, initial workload was set at 70W and increased by 40W per 8min. Capillary  
124 blood samples were obtained every 4min for determination of blood lactate concentration  
125 (Lactate Pro2; Arkray, Amstelveen, The Netherlands), with LT being defined as the lowest  
126 workload provoking a 1 mM blood [lactate] increase within the same stage (25–27). After  
127 15min of active recovery at 70W, participants started a second incremental cycling test  
128 (100W + 25W/30sec) until volitional exhaustion. Throughout this test, oxygen consumption  
129 ( $V\dot{V}O_2$ ) and carbon dioxide production ( $V\dot{V}CO_2$ ) rates were measured continuously using  
130 indirect calorimetry (Cortex Metalyzer 3B, Cortex, Leipzig, Germany), and  $V\dot{V}O_{2max}$  was  
131 calculated as the highest  $V\dot{V}O_2$  over a 30-sec period.

132 In the 2 weeks before the first experimental session, participants performed the full  
133 experimental protocol twice in normoxia to get accustomed to the experimental procedures,  
134 exercise protocols, and sleeping facility. Starting from the first familiarization session,

135 participants were asked to maintain a stable sleep schedule until the final experimental  
136 session. This included the requirement to sleep 7-9h per night, with bed-time between 10-12  
137 PM and wake-time between 6-8 AM. Compliance to a stable sleep-wake schedule was  
138 assessed throughout the entire study period via a sleep diary and actigraphy (Actigraph  
139 wGT3X-BT, ActiGraph LLC, Pensacola, Florida, US). Moreover, sleep quality of the night  
140 prior to each experimental session was also assessed using the St. Mary's Sleep questionnaire.

141 *Experimental sessions.* After waking up at their individually predetermined time,  
142 participants arrived in a fasted state between 7.00 and 9.00 AM at the testing facility (exact  
143 timings were replicated for each session). 2.5h after consuming a standardized breakfast (see  
144 *Dietary standardization* below), they performed a 2-h morning endurance training session  
145 (ET<sub>120'</sub>) on a cycling ergometer (Tacx Neo Smart, Wassenaar, The Netherlands). ET<sub>120'</sub>  
146 consisted of eight consecutive 15-min intervals with workload alternating between 60% and  
147 80% of LT. 1.5h after lunch time, participants completed an 80-min high intensity interval  
148 training (HIIT<sub>80'</sub>) on a cycling ergometer (Avantronic Cyclus II, Leipzig, Germany). HIIT<sub>80'</sub>  
149 consisted of a 10-min warm up at 70% of LT, followed by 10 repetitions of 3min at 120% of  
150 LT interspersed by 4min active recovery at 50% of LT. Thirty minutes after HIIT<sub>80'</sub> (~5h  
151 before sleep-time), participants entered their individual 'hotel room' that was set at either  
152 hypoxia (H<sub>PL</sub> and H<sub>KE</sub>; F<sub>I</sub>O<sub>2</sub>: 14.5% O<sub>2</sub>, P<sub>I</sub>O<sub>2</sub>: ~110 mmHg, ~3,000m simulated altitude) or  
153 normoxia (N<sub>PL</sub>; F<sub>I</sub>O<sub>2</sub>: 20.9% O<sub>2</sub>, P<sub>I</sub>O<sub>2</sub>: ~160 mmHg). Subsequently participants resided for  
154 16h under these environmental conditions, with sleep being measured in each condition using  
155 polysomnography (PSG). Following 16h of hypoxia/normoxia, participants returned to  
156 normoxia and exercise performance was assessed 3.5h later by means of an all-out 30-min  
157 time trial (TT<sub>30'</sub>). In addition, physiological measurements were performed at rest at the  
158 following timepoints: (i) before ET<sub>120'</sub> (baseline, 0h), (ii) after 2h in hypoxia or equivalent in  
159 normoxia (+10h), (iii) immediately upon waking up (+23h), and (iv) 2h after returning to



160 normoxia (+27h). These measurements included determination of heart rate (HR), heart rate  
161 variability (HRV), ventilatory parameters, and blood, brain and skeletal muscle oxygenation.

162

163 *Supplementation protocol.* In a randomized order, participants received 25g of either a  
164 ketone ester [ $H_{KE}$ , 96% (R)-3-hydroxybutyl (R)-3-hydroxybutyrate, KetoneAid Inc., Falls  
165 Church, Virginia, USA] or a placebo ( $N_{PL}$  and  $H_{PL}$ , details below) supplement immediately  
166 after (i)  $ET_{120'}$  and (ii)  $HIIT_{80'}$ , (iii) after 1.5h in hypoxia (or equivalent in normoxia), and (iv)  
167 30min before sleep. Hence, in  $H_{KE}$  participants received a total dose of 100g ketone ester  
168 ( $1.39 \pm 0.17$  g·kg<sup>-1</sup> body weight) in order to intermittently elevate blood ketone bodies post-  
169 exercise and throughout the first part of the night. In  $N_{PL}$  and  $H_{PL}$ , participants received a total  
170 of 100g of a taste and viscosity matched, inert placebo consisting of 12.5% w/v collagen (6d  
171 Sports Nutrition, Oudenaarde, Belgium) and 1 mM bitter sucrose octaacetate (Sigma-Aldrich,  
172 Bornem, Belgium) dissolved in water. In total, caloric intake via the KE supplements was  
173 ~700 kcal vs. ~0 kcal for the placebo supplements. Randomization was performed by a  
174 researcher who was otherwise not involved in the study.

175 *Dietary standardization.* The evening before each experimental session, participants  
176 consumed a standardized carbohydrate-rich dinner at home (~5,600 kJ; 69% carbohydrate,  
177 16% fat, 15% protein). Water consumption was allowed *ad libitum* until arrival at the facility  
178 the next morning, and was replicated for each session. After participants arrived at the testing  
179 facility in a fasted state, they consumed a standardized breakfast (~4,200 kJ; 68%  
180 carbohydrate, 21% fat, and 11% protein). Subsequently participants received a carbohydrate-  
181 rich snack (~660 kJ; 92% carbohydrate, 3% fat, and 5% protein) 1h before  $ET_{120'}$ , and  
182 received 60g carbohydrates per hour during  $ET_{120'}$  via isotonic drinks and carbohydrate-rich  
183 snacks (6d Sports Nutrition, Oudenaarde, Belgium). A light lunch (~4,150 kJ; 74%  
184 carbohydrate, 25% fat, and 14% protein) was provided 1.5h before  $HIIT_{80'}$ , and participants

185 received a high-carbohydrate, high-protein recovery shake (60g carbohydrate, 30g protein, 6d  
186 Sports Nutrition, Oudenaarde, Belgium) immediately after HIIT<sub>80'</sub>. After 30min in  
187 hypoxia/normoxia, a standardized dinner (~3,250 kJ; 69% carbohydrate, 5% fat, and 26%  
188 protein) was served while participants received a light snack (~1,700 kJ of which 69 %  
189 carbohydrates, 15 % protein, 16 % fat) 2h before sleep time in order to prevent participants  
190 from going to bed hungry. Hence, total caloric intake on the first day – excluding the KE  
191 supplements – was ~3,590 kJ. The next morning, participants received an identical breakfast  
192 as on the first day, and received a carbohydrate-rich snack (cfr. before ET<sub>120'</sub>) 30min before  
193 TT<sub>30'</sub>.

194

#### 195 *Nocturnal measurements.*

196 *Polysomnography (PSG).* A digital amplifier (V-amp, Brain Products, Gilching,  
197 Germany) was used to record sleep quality and quantity during the experimental sessions, and  
198 data were digitized at a sampling rate of 1000 Hz. According to the international 10 – 20  
199 system, electroencephalographic (EEG) recordings were made from Fz, Cz, Pz, Oz, C3, C4,  
200 A1, and A2 where the A2 electrode served as the reference electrode and A1 as a backup  
201 reference. A ground electrode was positioned in the middle of the forehead. Eye movements  
202 (vertical/horizontal) were recorded with electrooculographic (EOG) electrodes above and  
203 under the right eye and with electrodes attached to the outer cantus of both eyes. A 0.1 Hz low  
204 cut-off filter and a 30 Hz high cut-off filter were applied to both EEG and EOG data.  
205 Submental muscle tone and movements were assessed with a electromyogram (EMG) of the  
206 chin, recorded with a low cut-off filter of 10 Hz and a high cut-off filter of 200 Hz. Electrical  
207 noise was filtered out with a 50 Hz notch filter. A blinded, independent, certified sleep  
208 technician (Sleep Well PSG, Canada) visually scored night recordings following the  
209 Rechtschaffen & Kales guidelines, in conjunction with the AASM guidelines, in 30 s epochs.

210 A 0.3 – 35 Hz, 0.3 – 30 Hz, and a 10 – 100 Hz bandpass filter was used for EEG, EOG and  
211 EMG signals, respectively. The assessed sleep variables were: (i) total sleep time, (ii) WASO,  
212 (iii) total NREM and REM sleep, (iv) total N1, N2, and REM and SWS sleep, (v) sleep onset,  
213 sleep onset to N2, SWS, and REM sleep, (vi) sleep efficiency (total sleep time/time in bed),  
214 and (vii) amount of awakenings.

215 *Sleep event detection.* EEG data were preprocessed in BrainVision Analyzer (Brain  
216 Products GmbH, Gilching, Germany). After applying a 0.1 – 30 Hz bandpass filter, data were  
217 transferred to a Python environment (version 3.10.5). Detection of both ‘slow waves’ and  
218 ‘sleep spindles’ was performed according to previously described guidelines (28). For each  
219 channel, the densities of slow waves and sleep spindles were averaged across the channels for  
220 N2 and SWS phases.

221 *Oxygen saturation and HR.* During the participants’ registered sleep time, blood oxygen  
222 saturation (SpO<sub>2</sub>) and HR were continuously assessed using pulse oximetry (Nellcor PM10N,  
223 Medtronic, Minneapolis, USA). These data were used to calculate both average and minimal  
224 HR, the minimal SpO<sub>2</sub>, the average nocturnal SpO<sub>2</sub> both over the entire night, as well as  
225 within 10% epochs of the night. Furthermore, variation in SpO<sub>2</sub> was assessed through a  
226 coefficient of variation (CV) for every hour ( $CV_i = SD_i / \text{mean}_i$  with  $i$  = the hour of the night)  
227 in agreement with an earlier study (29).  $CV_i$  was calculated given earlier evidence that  
228 periodic breathing causes fluctuations in nocturnal oxygen saturation in preterm infants (30).

229

230 *Resting measurements.* All resting measurements were performed by the same trained  
231 researcher. Measurements were performed throughout a 10min time-window and with the  
232 participants being in supine position for at least 10min before the start of the first  
233 measurement. Data for all parameters are presented as the average values of the last minute.

234 *Blood and tissue oxygenation status.* Blood oxygen saturation (SpO<sub>2</sub>) was assessed using  
235 a pulse oximeter (Nellcor PM10N, Medtronic, Minneapolis, USA) with an infrared sensor  
236 placed ~2 cm above the left eyebrow and with sampling frequency set at 2 Hz. Cerebral and  
237 skeletal muscle oxygenation status were assessed by means of tissue oxygenation index (cTOI  
238 and mTOI, resp.) using near infrared spectroscopy (NIRS). The probes of a NIRO-200  
239 spectrometer (Hamamatsu, Japan) were attached ~2 cm above the right eyebrow (cerebral  
240 oxygenation) and centrally on the belly of the right *m. vastus lateralis* (skeletal muscle  
241 oxygenation). A constant penetration depth of ~2 cm into the muscle/brain tissue was ensured  
242 by inserting the emitter and detector probes in a dark-colored rubber spacer, maintaining a  
243 fixed interoptode distance of 4 cm. These spacers were attached to the participants using an  
244 elastic non-transparent bandage and double-sided adhesive tape to prevent displacement or  
245 interference from external light. Before each experimental session, the participants' skin was  
246 shaved and cleaned to exclude any signal disturbance by hair or impurities. Moreover, exact  
247 inter-session replication was guaranteed by marking the contour lines of the rubber spacer on  
248 the skin. Participants were asked to preserve and refresh these marks during the washout  
249 period in order to maintain this position during the following sessions. After experimental  
250 data collection, NIRS data were preprocessed (Matlab R2023a, The Mathworks, Natick, MA)  
251 over 1-min long time chunks using a fourth-order Butterworth filter with a cut-off frequency  
252 of 0.05 Hz (24).

253 *Heart rate and heart rate variability.* Resting HR and RR-peak intervals were measured  
254 using a Polar H10 (Polar, Kempele, Finland). HRV was analyzed by using the percentage of  
255 adjacent NN intervals that differ by more than 50 ms (pNN50), the root mean square of  
256 successive differences (RMSSD), and absolute power of the high-frequency band (HF) using  
257 Kubios (Kubios HRV Standard 3.5.0, Kubios Oy, Kuopio, Finland).

258 *Ventilatory gas exchange measurements.* Indirect calorimetry (Cortex Metalyzer 3b,  
259 Leipzig, Germany) was used to measure breath-by-breath gas exchange data [*i.e.*, minute  
260 ventilation ( $V\dot{V}_E$ ), oxygen uptake rate ( $V\dot{V}O_2$ ) and carbon dioxide production rate  
261 ( $V\dot{V}CO_2$ )].

262

263 **Exercise performance.** After returning to normoxia on the second day, participants  
264 performed  $TT_{30'}$  which was preceded by a 15-min warm-up at 70% of LT on a cycling  
265 ergometer (Avantronic Cyclus II, Leipzig, Germany). Participants were instructed to achieve  
266 an average power output as high as possible and were allowed to voluntarily change the applied  
267 workload every 5min in the initial 25min, and every 1min during the final 5min. The starting  
268 workload was determined during the familiarization sessions, where initial power in the first  
269 session was set at the LT and in the second as the average power output of the first  $TT_{30'}$ . In  
270 turn, the average of the second  $TT_{30'}$  functioned as the starting workload of both experimental  
271  $TT_{30'}$ .

272

273 ***Capillary blood, urine sampling and analyses.***

274 *Capillary samples.* Before breakfast (baseline, 0h), thirty min after every supplement  
275 ingestion (+5.5h, +9h and +11h and +13h), and immediately upon waking up on the second  
276 morning (+23h), a capillary blood sample was obtained for immediate determination of D- $\beta$ -  
277 hydroxybutyrate (GlucoMen Areo 2K-meter with  $\beta$ -ketone sensor strips, A. Menarini  
278 Diagnostics, Firenze, Italy). In addition, 70  $\mu$ l capillary blood was collected from a hyperemic  
279 earlobe into a capillary tube (safeCLINITUBE, Radiometer Medical ApS, Copenhagen,  
280 Denmark) before every resting measurement (baseline, +10h, +23h and +27h) and  
281 immediately before sleep (+13h). After immediate mixing for 10sec, samples were analyzed

282 for acid-base balance, p50, and pCO<sub>2</sub> (ABL90 FLEX analyzer, Radiometer Medical ApS,  
283 Copenhagen, Denmark).

284 *Urine samples.* Immediately before sleep time, participants emptied their bladder and  
285 nocturnal urine was collected until wake-up in urine flasks prepared with 10 mL hydrochloric  
286 acid. A small volume (~10 mL) of urine was frozen (-80 °C) for subsequent analyses of  
287 adrenaline, noradrenaline, and dopamine using a commercially available ELISA kit (BA E-  
288 6600, LDN, Nordhorn, Germany) within 4 weeks after the final experimental session.

289

290 *Statistical analyses.* All statistical analyses were performed in GraphPad Prism version  
291 10.1.2 (GraphPad Software, La Jolla, CA, USA). Prior to statistical testing, normal  
292 distribution of the data was evaluated and confirmed with the D'Agostino-Pearson normality  
293 test for SpO<sub>2</sub> and HR during the night as well as power output and HR during TT<sub>15</sub>. One way  
294 analysis of variance (ANOVA) was used to evaluate differences between conditions for  
295 measurements obtained at a single time point during each session. Data collected at multiple  
296 time points within a given experimental session were analyzed by means of a two-way  
297 repeated measures ANOVA. A Geisser-Greenhouse correction was applied whenever the  
298 assumption of sphericity was violated (Mauchly's test, JASP version 0.18.1, JASP Team,  
299 Amsterdam, The Netherlands). In case of a significant main or interaction effect, *post-hoc*  
300 analyses were performed using Šidák's correction. When applicable, reported p-values refer  
301 to these post-hoc analyses and otherwise, p-values for main effects were included. All data are  
302 presented as mean ± SD and statistical significance was defined as p < 0.05. An a-priori  
303 sample size calculation was performed based on the effect size of KE on sleep efficiency (i.e.,  
304 primary outcome of the current study) that was derived from our previous study investigating  
305 the effect of KE during sleep in normoxia (25). Power analysis (G\*Power version 3.1.9.7)  
306 indicated that a sample size of 6 per condition is required to establish a significant effect on

307 sleep efficiency (effect size  $\eta_p^2$ : 0.45;  $\alpha$  error: 0.05; power: 0.80; correlation among repeated  
308 measures: 0.5; nonsphericity correction: 1; ANOVA: repeated measures, within factors).

309 **RESULTS**

310 **Blood  $\beta$ HB concentrations.** A time x condition effect was observed for blood [ $\beta$ HB] ( $p$   
311  $< 0.001$ , Fig. 2). Baseline concentrations were low ( $\sim 0.4$  mM) in all conditions, and  
312 concentrations remained low ( $\sim 0.4$ - $0.5$  mM) throughout the entire protocol in  $N_{PL}$  and  $H_{PL}$ .  
313 Conversely, blood [ $\beta$ HB] consistently increased to 2-3 mM (range: 1.4 to 4.7 mM) thirty min  
314 after ingestion of each KE supplement. Upon waking up the second day of the protocol, blood  
315 [ $\beta$ HB] had returned to baseline values in all conditions.

316

317 **Sleep architecture.** Time in bed was kept constant for a given subject across all  
318 conditions and was on average  $512 \pm 25$ min. Compared to  $N_{PL}$ ,  $H_{PL}$  decreased sleep  
319 efficiency by 3% ( $p = 0.037$ , Fig. 3a). This was mediated by a doubling ( $+ \sim 17$ min) of WASO  
320 ( $p = 0.049$ , Fig. 3b), increased number of arousals ( $p = 0.027$ , Fig. 3c) while sleep onset  
321 latency ( $p = 0.316$ , Fig. 3d), and latencies of N2, SWS and REM phases remained unaffected  
322 (all  $p > 0.29$ , data not shown). The reduced sleep efficiency in  $H_{PL}$  vs.  $N_{PL}$  was accompanied  
323 by a  $\sim 22\%$  reduction in SWS ( $p = 0.002$ , Fig. 3e), and a  $\sim 39\%$  increase in N1 duration ( $p =$   
324  $0.034$ , Fig. 3f), while N2 phase and REM sleep duration remained unaffected ( $p > 0.271$ , Fig.  
325 3g-h, resp.). KE did not affect any of the hypoxia-induced dysregulations as all parameters  
326 were similar between  $H_{PL}$  and  $H_{KE}$  (all  $p > 0.340$ ). Densities of both sleep spindles and slow  
327 waves during N2 ( $p = 0.082$  and  $p = 0.307$ , resp.) and SWS ( $p = 0.752$  and  $p = 0.782$ , resp.)  
328 were unaffected throughout the experimental sessions (data not shown).

329

330 **Subjective sleep quality.** A main effect was observed for the following questions in the  
331 St. Mary's sleep questionnaire; 'How deep was your sleep?' ( $N_{PL}$ :  $5 \pm 1$ ,  $H_{PL}$ :  $4 \pm 1$ ,  $H_{KE}$ :  $4 \pm$   
332  $1$ ;  $p = 0.007$ ), 'How many times did you wake up?' ( $N_{PL}$ :  $3 \pm 1$ ,  $H_{PL}$ :  $4 \pm 2$ ,  $H_{KE}$ :  $4 \pm 1$ ;  $p =$   
333  $0.007$ ), 'How clear-headed did you feel after getting up this morning?' ( $N_{PL}$ :  $4 \pm 1$ ,  $H_{PL}$ :  $2 \pm$



334 1,  $H_{KE}$ :  $3 \pm 1$ ;  $p = < 0.001$ ), ‘*How satisfied were you with last night’s sleep?*’ ( $N_{PL}$ :  $4 \pm 1$ ,  $H_{PL}$ :  
335  $3 \pm 1$ ,  $H_{KE}$ :  $3 \pm 1$ ;  $p = 0.015$ ). Post-hoc analyses indicated that, compared to  $N_{PL}$ , participants  
336 in  $H_{PL}$  perceived that they slept less deep, woke up more times during the night, felt less clear-  
337 headed after getting up and were less satisfied with their night’s sleep. Except for a more  
338 clear-headed feeling upon waking up in  $H_{KE}$  ( $p = 0.012$  vs.  $H_{PL}$ ), no differences were observed  
339 between  $H_{PL}$  and  $H_{KE}$ . No effects were observed for the questions ‘*How much sleep did you*  
340 *have last night?*’ ( $N_{PL}$ :  $8 \pm 1$ ,  $H_{PL}$ :  $7 \pm 1$ ,  $H_{KE}$ :  $8 \pm 1$ ;  $p = 0.099$ ), ‘*How much sleep did you*  
341 *have during the day, yesterday?*’ ( $N_{PL}$ :  $0 \pm 0$ ,  $H_{PL}$ :  $0 \pm 0$ ,  $H_{KE}$ :  $0 \pm 0$ ), ‘*How well did you sleep*  
342 *last night?*’, ( $N_{PL}$ :  $4 \pm 1$ ,  $H_{PL}$ :  $3 \pm 1$ ,  $H_{KE}$ :  $3 \pm 1$ ;  $p = 0.051$ ), ‘*Were you troubled by waking*  
343 *early and being unable to get off to sleep again?*’, ( $N_{PL}$ :  $1 \pm 1$ ,  $H_{PL}$ :  $0 \pm 1$ ,  $H_{KE}$ :  $1 \pm 0$ ;  $p =$   
344  $0.123$ ) and ‘*How much difficulty did you have in getting off to sleep last night?*’, ( $N_{PL}$ :  $1 \pm 1$ ,  
345  $H_{PL}$ :  $2 \pm 1$ ,  $H_{KE}$ :  $1 \pm 0$ ;  $p = 0.224$ )

346

347 **Nocturnal oxygen saturation and heart rate.** At the start of the night,  $SpO_2$  was 9%  
348 lower in  $H_{PL}$  compared to  $N_{PL}$  ( $p < 0.001$ , Fig. 4a). Throughout the first half of the night,  
349  $SpO_2$  gradually decreased in all conditions, reaching minimal  $SpO_2$  levels after ~220min in  
350 bed or ~44% of sleep for all conditions ( $p = 0.954$  and  $p = 0.921$ , resp., data not shown). Due  
351 to both lower baseline values and a steeper reduction throughout the night in  $H_{PL}$  vs.  $N_{PL}$ ,  
352 minimal and average  $SpO_2$  were respectively 20 and 13% lower in  $H_{PL}$  compared to  $N_{PL}$  ( $p <$   
353  $0.001$ , Fig. 4b-c). KE ingestion alleviated the gradual drop in  $SpO_2$  throughout the first part of  
354 the night (Fig. 4a). Hence,  $SpO_2$  after 40% of the night, as well as minimal  $SpO_2$  were both  
355 4% higher in  $H_{KE}$  vs.  $H_{PL}$  ( $p = 0.029$  and  $p = 0.048$ , Fig. 4a and Fig. 4b, resp.). Conversely,  
356 average nocturnal  $SpO_2$  was similar between  $H_{KE}$  and  $H_{PL}$  ( $p = 0.519$  vs.  $H_{PL}$ , Fig. 4c).

357  $H_{PL}$  strongly increased the CV of  $SpO_2$  during all hours of the night compared to  $N_{PL}$  ( $p$   
358  $< 0.002$ , Fig. 4d). This increase in CV was attenuated by KE ingestion during the 2<sup>nd</sup> hour of

359 the night ( $p = 0.008$  vs.  $H_{PL}$ ), but not at any of the other timepoints. Compared to  $N_{PL}$ ,  $H_{PL}$   
360 increased minimal and average nocturnal HR by respectively ~10% and ~20% ( $p = 0.008$  and  
361  $p < 0.001$  vs.  $N_{PL}$ , resp, Fig. 4e-f). KE further increased minimal nocturnal HR by ~8% ( $p =$   
362  $0.019$  for  $H_{KE}$  vs.  $H_{PL}$ ), and tended to further elevate average nocturnal HR ( $p = 0.079$  for  $H_{KE}$   
363 vs.  $H_{PL}$ ).

364

365 **Exercise performance.** Mean power output during  $TT_{30'}$  was similar between all  
366 conditions at ~285W [ $p = 0.454$ , confidence interval (CI): -5 to +9 W for  $N_{PL}$  vs.  $H_{PL}$  and -9  
367 to +12 for  $H_{KE}$  vs.  $H_{PL}$ , Fig. 5a,b). Also average HR during  $TT_{30'}$  (Fig. 5c) was similar  
368 between all conditions ( $p = 0.251$ ). However, after 5 min of passive recovery, participants HR  
369 remained ~6-9 bpm higher in  $H_{PL}$  and  $H_{KE}$  compared to  $N_{PL}$  ( $p < 0.001$ , Fig. 5d)

370

371 **Resting measurements – oxygen status, heart rate and heart rate variability.** A time x  
372 condition effect was detected for  $SpO_2$  ( $p < 0.001$ , Table 1). Compared to  $N_{PL}$ ,  $SpO_2$  dropped  
373 to a similar extent in  $H_{PL}$  and  $H_{KE}$  both at +10h ( $p < 0.001$  vs.  $N_{PL}$ ) and +23h ( $p < 0.001$  vs.  
374  $N_{PL}$ ). Conversely, both cTOI and mTOI remained stable at respectively ~73% and ~67% in all  
375 experimental conditions (data not shown). For HR, a time x condition effect was found ( $p <$   
376  $0.001$ , Table 1). Post-hoc analyses indicated that HR was ~14% higher in  $H_{PL}$  vs.  $N_{PL}$  at +10h  
377 ( $p < 0.001$ ), and even ~20% higher at +23h ( $p < 0.001$ ). KE ingestion further increased resting  
378 HR at +10h ( $p < 0.001$  vs.  $H_{PL}$ ). An interaction effect was observed for all measured HRV  
379 indices (pNN50,  $p = 0.002$ ; RMSSD,  $p < 0.001$ ; HF,  $p = 0.005$ ; Table 1). Compared to  $N_{PL}$ ,  
380  $H_{PL}$  lowered pNN50, RMSSD and HF at +10h, while at +23h only pNN50 and RMSSD were  
381 decreased. KE did not alter the impact on RMSSD, but lowered pNN50 and HF at +23h  
382 compared to  $H_{PL}$ .

383

384 ***Resting measurements – acid-base balance, blood gasses and ventilatory parameters.***

385 Blood pH, p50, pCO<sub>2</sub>, as well as ventilatory parameters were similar between all conditions at  
386 baseline (Table 2). Compared to N<sub>PL</sub>, H<sub>PL</sub> increased blood pH at +10h and +23h but not at  
387 +27h, while pCO<sub>2</sub> was decreased at all timepoints. Conversely, p50 remained similar between  
388 N<sub>PL</sub> and H<sub>PL</sub> at all timepoints. Relative to H<sub>PL</sub>, H<sub>KE</sub> caused a slight acidosis at +10h which was  
389 accompanied by a KE-induced reduction in pCO<sub>2</sub>, and an increase in p50. Each of these KE-  
390 induced alterations were again normalized at +23h and +27h. Irrespective of the experimental  
391 condition, V̇E was similar at baseline (11.5 ± 0.2 L.min<sup>-1</sup>), increased at +10h (13.1 ± 0.2  
392 L.min<sup>-1</sup>, p < 0.001 vs. baseline) and decreased at +23h (9.9 ± 0.4 L.min<sup>-1</sup>, p = 0.001 vs.  
393 baseline). V̇O<sub>2</sub> was similar at baseline (0.161 ± 0.014 L.min<sup>-1</sup>) and increased at +10h (0.236  
394 ± 0.009 L.min<sup>-1</sup>, p = 0.004 vs. baseline). Also V̇CO<sub>2</sub> was similar at baseline (0.182 ± 0.012  
395 L.min<sup>-1</sup>) yet decreased at +27h (0.0125 ± 0.017 L.min<sup>-1</sup>, p = 0.018 vs. baseline).

396

397 ***Nocturnal catecholamine excretion.*** Nocturnal urine production was similar in all  
398 conditions (N<sub>PL</sub>: 679 ± 375 mL, H<sub>PL</sub>: 626 ± 223 mL, H<sub>KE</sub>: 685 ± 321 mL, p = 0.647). Also  
399 nocturnal adrenaline (N<sub>PL</sub>: 5.86 ± 3.66 nmol, H<sub>PL</sub>: 6.93 ± 4.16 nmol, H<sub>KE</sub>: 6.60 ± 4.14 nmol, p  
400 = 0.305), noradrenaline (N<sub>PL</sub>: 52.5 ± 22.2 nmol, H<sub>PL</sub>: 50.3 ± 10.8 nmol, H<sub>KE</sub>: 56.7 ± 12.4  
401 nmol, p = 0.608) and dopamine (N<sub>PL</sub>: 911 ± 305 nmol, H<sub>PL</sub>: 795 ± 229 nmol, H<sub>KE</sub>: 956 ± 350  
402 nmol, p = 0.324) excretions were unaffected by the different conditions.

403

404

405

406 **DISCUSSION**

407 Sleeping at (simulated) altitude is increasingly common in athletes either as part of altitude  
408 training camps or due to competitions at such altitudes. Earlier studies indicated that, starting  
409 from ~2,000m, this typically causes an acute reduction in sleep quality (2–10) thereby  
410 potentially impairing exercise recovery and readiness to perform. We recently observed that  
411 KE ingestion counteracts sleep disruptions induced by late-evening exercise under normoxic  
412 conditions (25). Furthermore, KE has also been shown to attenuate hypoxemia, which is  
413 considered the primary mechanism underlying hypoxia-induced sleep disturbances (23, 24).  
414 Therefore, we investigated whether KE ingestion could counteract sleep disruptions induced  
415 by sleeping at altitude (i.e., 3,000m), and impact next day endurance exercise performance.  
416 Sleeping at altitude impaired sleep quality as evidenced by a 3% reduction in sleep efficiency,  
417 a doubling of WASO and a ~20% reduction in slow wave sleep. These sleep disturbances did  
418 not affect performance during a 30-min time-trial the next day, but reduced subsequent heart  
419 rate recovery. KE slightly alleviated nocturnal hypoxemia but was unable to negate these  
420 sleep disruptions, nor impacted next day exercise performance or subsequent heart rate  
421 recovery.

422 Based on the available literature, sleeping at 3,000m altitude is expected to increase WASO  
423 (3–7, 9) and potentially decrease slow wave sleep (2, 5, 6, 9, 13), while REM sleep and sleep  
424 efficiency generally remain unaffected up to altitudes of ~4,000m (2, 4, 6, 7, 11–13).  
425 Although our results on WASO, slow wave sleep and REM are in line with available  
426 literature, we observed that even lower simulated altitudes (i.e. 3,000 m) can already elicit a  
427 drop in sleep efficiency. As sleep efficiency depicts the time spent asleep over the time spent  
428 in bed, with the latter standardized over all sessions, this drop was established by a decreased  
429 time asleep through a doubling in WASO. The divergent vs. convergent effects on  
430 respectively SE and WASO between our study and earlier studies likely resulted from the fact

431 that we, in contrast to most of the earlier studies, standardized the total time in bed. This is  
432 supported by two earlier studies showing that under free-living conditions the observed  
433 increase in nocturnal wakefulness upon altitude is at least in part compensated by a ~5%  
434 increase in time in bed (6, 7). Nevertheless, this increase in time in bed failed to reach  
435 statistical significance in both studies.

436 Increased awakenings upon hypoxia are generally attributed to a hypoxia-induced periodic  
437 breathing pattern (5, 31). This phenomenon almost exclusively occurs during NREM sleep  
438 and especially during SWS, and causes short awakenings or arousals and disruption of SWS.  
439 Our observations indicating that hypoxia decreases SWS but not REM sleep, together with an  
440 increased amount of arousals, thus indirectly endorse the important role of periodic breathing  
441 in hypoxic sleep impairment. This is further supported by our observation that hypoxia  
442 drastically increased the periodic variation of SpO<sub>2</sub> during the night, which is a central  
443 hallmark of periodic breathing (29).

444 Sleep disturbances can evoke a myriad of negative effects on processes implicated in  
445 exercise performance, training adaptation, and general health. This is evidenced by studies  
446 showing that large reductions in sleep quantity (reductions of 2-3 h.night<sup>-1</sup> for 1 to 5 days) for  
447 instance increase heart rate during submaximal exercise (14), suppress myofibrillar and  
448 sarcoplasmic protein synthesis rates (15, 16), and impair mitochondrial respiratory function  
449 (16) and insulin sensitivity (17). Although some studies reported a concomitant drop in both  
450 sprint and endurance cycling performance (19, 20), even such large sleep disruptions do not  
451 always evoke impairments in exercise performance (14, 18). However, to our knowledge, no  
452 data is available on the impact of more subtle sleep disturbances such as those observed in our  
453 study.

454 The minor sleep disturbances induced by hypoxia in our study did not affect  $TT_{30}$   
455 performance, nor altered resting heart rate, heart rate variability or respiratory parameters the  
456 day after. However, the (disrupted) night in hypoxia compromised heart rate recovery after  
457  $TT_{30}$  as evidenced by the ~10 bpm higher heart rate in  $H_{PL}$  vs.  $N_{PL}$  five min after completion  
458 of  $TT_{30}$ . A reduced or delayed heart rate recovery reflects an impaired vagal activity (32), a  
459 strong predictor for morbidity (33), which is generally associated with cardiovascular disease  
460 (34) and overtraining (35). This impaired heart rate recovery upon hypoxia may be related to  
461 the hypoxia-induced reduction in SWS. Indeed, selective SWS suppression was previously  
462 found to disrupt sympathovagal balance by decreasing vagal tone (36) and stimulation of slow  
463 waves during sleep improved next day cardiac function, as evidenced through an improved  
464 left-ventricular systolic function (37, 38). This indicates that although exercise performance  
465 was not affected after one disrupted night, more subtle changes are present which may in the  
466 longer term impact exercise recovery, performance or general (cardiovascular) health.

467 In contrast to our hypothesis, KE ingestion did not counteract the hypoxia-induced sleep  
468 dysregulations. This conflicts with our earlier data showing that KE intake negated the sleep  
469 disruptions induced by strenuous late evening exercise under normoxic conditions (25). A  
470 potential explanation for these contrasting observations are the disparate effects of strenuous  
471 late evening exercise vs. hypoxia on sleep architecture. Both conditions caused a decrease in  
472 sleep efficiency and an increase in WASO. However, while strenuous late evening exercise  
473 decreased REM sleep without affecting NREM sleep, hypoxia did not affect REM sleep but  
474 decreased SWS. This suggests that ketosis may only beneficially impact sleep when REM is  
475 disrupted. This is supported by an earlier study showing that a ketogenic diet improved REM  
476 sleep in children with epilepsy (39), a condition typically associated with reduced REM sleep  
477 (40). More recent data collected by our group during a 7-week exercise training program  
478 confirms this hypothesis as KE only increased REM sleep relative to a placebo group

479 whenever REM sleep dropped below baseline values (Robberechts et al., unpublished  
480 observations). We previously suggested that the ability of KE to counteract reductions in  
481 REM sleep was mediated through an increased dopamine signaling following KE ingestion  
482 (41, 42), as dopamine plays an important role in the transition from NREM to REM sleep  
483 (43). However, in contrast to our earlier studies, KE intake did not affect nocturnal dopamine  
484 excretion in the current study.

485 An important factor in compromised hypoxic sleep is hypoxemia, and subsequent  
486 periodic breathing. As described above, periodic breathing induces periods of hypopnea and  
487 apnea causing short awakenings especially during SWS (12). As minimal SpO<sub>2</sub> values are  
488 closely related to the apneic part of a periodic breathing cycle (44), the observed KE-induced  
489 increase (~+3%) in minimal SpO<sub>2</sub> and SpO<sub>2</sub> at 40% of sleep duration together with the  
490 diminished variance in nocturnal SpO<sub>2</sub> after 2h of sleep suggest a slightly tempered periodic  
491 breathing behavior after KE ingestion. However, this effect was likely too small to translate in  
492 sleep improvements. As nocturnal respiration was not recorded in the current study, further  
493 research is required to identify if KE may impact periodic breathing.

494 On the other hand, hypoxemia activates a wide array of adaptive responses, amongst  
495 others establishing the respiratory alkalosis observed in H<sub>PL</sub>, causing a left-shift of the  
496 oxyhemoglobin dissociation curve (ODC) and thus favoring a higher SpO<sub>2</sub> for a given pO<sub>2</sub>.  
497 Ingestion of KE, contrarily, established a relative metabolic acidosis in agreement with earlier  
498 data (23, 24), thereby pushing a right-shift of the ODC as evidenced by the observed increase  
499 in p50. Nevertheless, average nocturnal SpO<sub>2</sub> values were similar after ingestion of KE  
500 compared to PL and only after 40% of sleep duration, SpO<sub>2</sub> was higher in KE. This can at  
501 least partly be explained by the higher capillary pO<sub>2</sub> values that were observed immediately  
502 before sleep, i.e. after 5h in hypoxia, in H<sub>KE</sub> ( $56.8 \pm 3.4$  mmHg) vs. H<sub>PL</sub> ( $53.3 \pm 4.0$  mmHg)  
503 thereby compensating the right shift of the ODC. It should however be highlighted that pO<sub>2</sub>

504 values were obtained using a capillary sampling method, which might underestimate actual  
505 arterial pO<sub>2</sub>.

506 As indicated above, KE increased SpO<sub>2</sub> at 40% of the night, as well as minimal nocturnal  
507 SpO<sub>2</sub>, but did not impact SpO<sub>2</sub> at any other timepoint. This is most likely related either to (i)  
508 the extent of hypoxemia or (ii) to the specific duration of ketosis or hypoxic exposure. This is  
509 supported by our two earlier studies showing that KE attenuated hypoxemia only after ~3-4h  
510 of hypoxic exposure and ketosis, and whenever SpO<sub>2</sub> values were below ~82% (23, 24).  
511 These requirements were fulfilled at 40% of the night, but not at the other timepoints where  
512 we measured SpO<sub>2</sub>. For instance, at +10h participants were in ketosis but had only resided in  
513 hypoxia for 2h, while at +23h, participants had resided in hypoxia for 14h however were no  
514 longer in ketosis. Furthermore, at the start of the night SpO<sub>2</sub> values were around 90% while  
515 during the final part of the night participants were most likely no longer in ketosis (25).

516 Besides hypoxemia, ketone bodies may also affect sleep by altering sympathetic nervous  
517 activity. In line with literature (45, 46), hypoxia caused an increase in both resting and  
518 nocturnal heart rate, as well as a decrease in all HRV parameters on the first evening of the  
519 protocol thereby suggesting a relative dominance of the sympathetic nervous system. Upon  
520 waking up however, HF values had recovered but RMSSD and pNN50 values remained  
521 depressed. While RMSSD and pNN50 are measures for overall HRV, HF isolates the high-  
522 frequency component (0.12-0.4 Hz) of the spectrum and entails information on ventilation  
523 and respiratory sinus arrhythmias (RSA), a phenomenon explaining fluctuation of HR and  
524 HRV together with natural breathing (47–49). As natural breathing is disrupted in hypoxia,  
525 both through periodic breathing and consistent hyperventilation, HF was indeed expected to  
526 increase (49). While SWS is associated with low heart rate variability in normoxia (50),  
527 sympathetic nerve activity is even higher during REM sleep compared to being awake (51).  
528 Although the exact relationship between sleep and sympathetic activity remains unclear, it



529 cannot be ruled out that this increased sympathetic dominance is linked to the hypoxia-  
530 induced disruption of SWS. However, whether this is either a cause or a consequence remains  
531 to be identified.

532 Despite unaffected nocturnal adrenaline and noradrenaline concentrations, KE lowered  
533 HRV indices pNN50 and RMSSD upon waking up and increased nocturnal HR. This  
534 indicates that, in line with earlier studies performed both in normoxia (25, 52, 53) and  
535 hypoxia (23), KE ingestion further promoted sympathetic dominance. In this context, through  
536 manipulation of sympathetic activity, ketone bodies may only potentially benefit sleep quality  
537 when REM sleep, and not SWS, is disrupted.

538 In conclusion, we observed that a single night of hypoxic exposure (~3,000m altitude)  
539 has a detrimental impact on sleep quality, through reduced sleep efficiency, SWS, and  
540 increased WASO. While this did not impact next day exercise performance, it hampered post-  
541 exercise heart rate recovery suggesting that sleeping at (simulated) altitude has minor  
542 implications for athlete training management. Contrary to our expectations, ketone ingestion  
543 did not mitigate any of these effects. However, we confirmed earlier data showing that KE  
544 can alleviate hypoxemia whenever SpO<sub>2</sub> values drop below ~82% and whenever subjects are  
545 at least for 3-4h in ketosis. Taken together with our earlier observations, ingestion of ketones  
546 as a strategy to improve sleep and recovery appears effective when REM sleep is disrupted  
547 (e.g., through late-evening exercise) whereas disruption of NREM sleep (through hypoxic  
548 exposure) remains unaffected.

549 **ADDITIONAL INFORMATION**

550 **Competing interests**

551 The authors declare that they have no competing interests.

552 **Author contributions**

553 All experiments were performed within the Exercise Physiology Research Group and the  
554 Bakala Academy-Athletic Performance Center at the KU Leuven, Belgium. Conception and  
555 design of the study: MS, TD and CP. Data collection and/or data analyses: MS, DT, WL, RR,  
556 MR, TD and CP. Interpretation of the data and manuscript drafting: MS and CP. All authors  
557 critically revised the manuscript and approved the final version of the manuscript.

558 **Funding**

559 This research was supported by the Research Foundation – Flanders (FWO Weave, research  
560 grant G073522N) and Slovene Research Agency grant (N5-0247). CP is supported by an  
561 FWO senior postdoctoral research grant (12B0E24N).

562 **Acknowledgements**

563 The authors wish to thank all participants for their dedicated cooperation in this study. We  
564 also thank Ms. Monique Ramaekers for skillful assistance during the experimental trials.

565

566 **TABLES**

567 **Table 1.** Effect of hypoxia ( $H_{PL}$  vs.  $N_{PL}$ ) and ketone ester (KE) ingestion ( $H_{KE}$  vs.  $H_{PL}$ ) on  
568 blood oxygen saturation ( $SpO_2$ ), heart rate (HR) and heart rate variability (HRV).

|                               | $N_{PL}$     | $H_{PL}$       | $H_{KE}$        |
|-------------------------------|--------------|----------------|-----------------|
| <b><math>SpO_2</math> (%)</b> |              |                |                 |
| Baseline                      | 97.4 ± 1.7   | 98.5 ± 1.5     | 98.7 ± 1.3      |
| +10h                          | 98.2 ± 1.1   | 87 ± 4 §#      | 88.5 ± 4.5 §#   |
| +23h                          | 98.1 ± 2.1   | 89.2 ± 2.6 §#  | 90.8 ± 3.3 §#   |
| +27h                          | 98.2 ± 1.7   | 97.9 ± 1.7     | 98.7 ± 1        |
| <b>HR (bpm)</b>               |              |                |                 |
| Baseline                      | 60.1 ± 6.1   | 60.7 ± 5.1     | 57.6 ± 6.1      |
| +10h                          | 65.6 ± 7.8 # | 74.9 ± 8.6 §#  | 84.8 ± 7 §#*    |
| +23h                          | 51.4 ± 6.3 # | 61.3 ± 9.7 §   | 63.6 ± 8.4 §#   |
| +27h                          | 55.2 ± 6.4 # | 56.9 ± 6.9     | 58.2 ± 7.8      |
| <b>pNN50 (%)</b>              |              |                |                 |
| Baseline                      | 43.4 ± 21.6  | 45.2 ± 24.8    | 52.5 ± 23.2     |
| +10h                          | 34.4 ± 23.5  | 14.1 ± 19.2 §# | 4.2 ± 7.6 §#    |
| +23h                          | 59.5 ± 24.9  | 38.3 ± 21.3 §  | 22.3 ± 17.1 §*# |
| +27h                          | 47.4 ± 23.5  | 50.1 ± 27.0    | 51.9 ± 23.2     |
| <b>RMSSD (ms)</b>             |              |                |                 |
| Baseline                      | 75.4 ± 41.7  | 74.2 ± 29.3    | 86.7 ± 37.4     |
| +10h                          | 62.7 ± 43.1  | 32.1 ± 22.2 §# | 21.3 ± 20.6 §#  |
| +23h                          | 94.2 ± 38.4  | 70.3 ± 36.2 §  | 50.8 ± 28.2 §#  |
| +27h                          | 88.9 ± 38.1  | 96.8 ± 51.6    | 87.8 ± 38.5     |
| <b>HF (log)</b>               |              |                |                 |
| Baseline                      | 7.42 ± 1.00  | 7.46 ± 0.72    | 7.41 ± 1.00 #   |
| +10h                          | 7.04 ± 1.00  | 5.67 ± 1.19 §# | 4.75 ± 1.56 §#  |
| +23h                          | 7.07 ± 0.99  | 7.14 ± 0.91    | 6.46 ± 1.16 *   |
| +27h                          | 7.48 ± 1.34  | 7.5 ± 1.25     | 7.62 ± 1.05     |

During a randomized, cross-over protocol, participants received either ketone ester (KE) or placebo (PL) supplements and spent the night either at a simulated altitude of 3,000m ( $H_{PL}$  and  $H_{KE}$ ) or in normoxia ( $N_{PL}$ ). Participants' blood oxygen saturation ( $SpO_2$ ), heart rate (HR) and heart rate variability (HRV) were assessed at baseline, after 2h in hypoxia/normoxia (+10h), immediately upon waking up in hypoxia/normoxia (+23h) and 2h after returning to normoxia (+27h). Mean values ± SD (n=11) are shown for  $SpO_2$ , HR, the percentage of adjacent NN intervals that differ by more than 50 ms (pNN50), the root mean square of successive differences (RMSSD), and the absolute power of the high-frequency band (HF). §, p < 0.05 vs.  $N_{PL}$ ; \*, p < 0.05 vs.  $H_{PL}$ ; #, p < 0.05 vs. baseline.



570 **Table 2.** Effect of hypoxia ( $H_{PL}$  vs.  $N_{PL}$ ) and ketone ester (KE) ingestion ( $H_{KE}$  vs.  $H_{PL}$ ) on  
571 blood acid base balance and capillary blood gases.

|                               | $N_{PL}$        | $H_{PL}$         | $H_{KE}$          |
|-------------------------------|-----------------|------------------|-------------------|
| <b>pH</b>                     |                 |                  |                   |
| Baseline                      | 7.409 ± 0.016   | 7.412 ± 0.013    | 7.406 ± 0.011     |
| +10h                          | 7.419 ± 0.021   | 7.438 ± 0.017 §# | 7.395 ± 0.016 §#* |
| +13h                          | 7.414 ± 0.014   | 7.433 ± 0.018 §# | 7.412 ± 0.027     |
| +23h                          | 7.421 ± 0.013 # | 7.451 ± 0.026 §# | 7.457 ± 0.009 §#  |
| +27h                          | 7.417 ± 0.015   | 7.431 ± 0.016 #  | 7.432 ± 0.018 #   |
| <b>p50 (mmHg)</b>             |                 |                  |                   |
| Baseline                      | 26.2 ± 0.5      | 25.9 ± 0.7       | 25.9 ± 0.9        |
| +10h                          | 25.1 ± 1 #      | 25.9 ± 0.7       | 26.8 ± 1.3 §*     |
| +13h                          | 25.8 ± 0.9      | 25.8 ± 1         | 25.5 ± 1.4        |
| +23h                          | 25.3 ± 1.3      | 25 ± 1           | 24.4 ± 1 §#       |
| +27h                          | 25.6 ± 1.1      | 25.7 ± 0.6       | 25.1 ± 1.2        |
| <b>pCO<sub>2</sub> (mmHg)</b> |                 |                  |                   |
| Baseline                      | 41.2 ± 2.2      | 42 ± 1.8         | 41.8 ± 1.7        |
| +10h                          | 42.4 ± 1.1      | 40.9 ± 1.4 §     | 38 ± 1.2 §*       |
| +13h                          | 42.4 ± 1.6      | 40 ± 2 §         | 37.3 ± 2 §*       |
| +23h                          | 41.5 ± 2.2      | 37 ± 2.1 §       | 36.7 ± 1.5 §      |
| +27h                          | 42.3 ± 1.7      | 39.4 ± 1.6 §     | 39 ± 1.9 §        |

During a randomized, cross-over protocol, participants received either ketone ester (KE) or placebo (PL) supplements and spent the night either at a simulated altitude of 3,000m ( $H_{PL}$  and  $H_{KE}$ ) or in normoxia ( $N_{PL}$ ). Participants' capillary blood was analyzed baseline, after 2h in hypoxia/normoxia (+10h), immediately before sleep (+13h) and upon waking up in hypoxia/normoxia (+23h) and 2h after returning to normoxia (+27h). Capillary blood pH, p50 and pCO<sub>2</sub> were evaluated. §, p < 0.05 vs.  $N_{PL}$ ; \*, p < 0.05 vs.  $H_{PL}$ ; #, p < 0.05 vs. baseline.

573 **FIGURES**

574 **Figure 1.** Schematic representation of the experimental protocol that was designed to  
575 mimic a live-high train-low (LHTL) strategy. In a double-blind, randomized, crossover  
576 design, 11 participants completed three experimental sessions each involving a two-day  
577 protocol. On day 1, subjects performed two exercise training sessions [120 min endurance  
578 training (ET<sub>120'</sub>) and 80 min high intensity interval training (HIIT<sub>80'</sub>)] in normoxia followed  
579 by a night either in normoxia (N), or at a simulated altitude of 3,000m (H). After each training  
580 session and before sleep, participants received either placebo (N<sub>PL</sub> and H<sub>PL</sub>) or ketone ester  
581 (H<sub>KE</sub>) supplements. On day 2, exercise performance was evaluated by means of a 30-min all-  
582 out time trial (TT<sub>30'</sub>). Sleep quality and architecture were assessed via polysomnography.  
583 Physiological measurements were performed in a resting state at baseline, after 2h in hypoxia  
584 or equivalent in normoxia, immediately upon waking up and 2h after return to normoxia in  
585 order to assess blood oxygen saturation, cerebral and muscular oxygenation status, ventilatory  
586 gas exchange, heart rate and heart rate variability. In addition, before every resting  
587 measurement, as well as immediately before sleep time, a capillary blood sample was  
588 collected for determination of acid-base balance, and blood gasses.

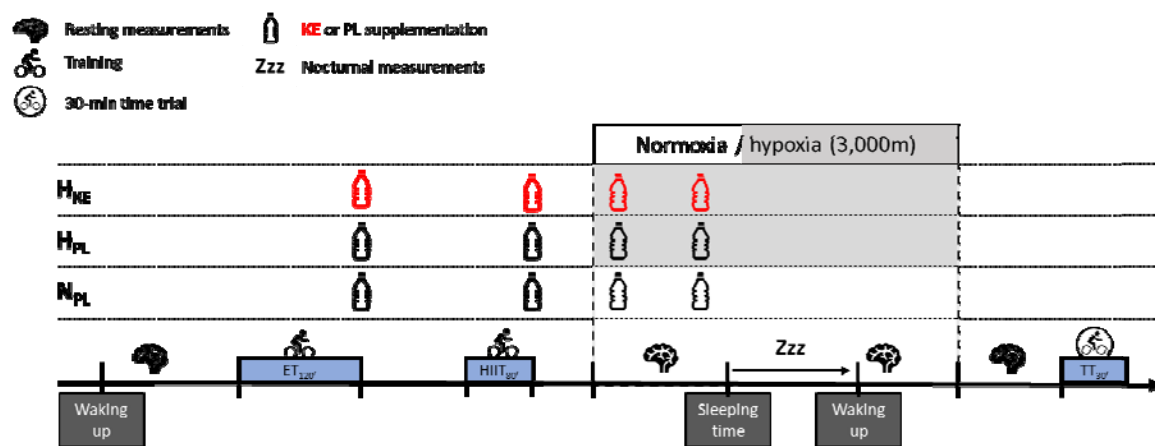

591 **Figure 2.** Blood D- $\beta$ -hydroxybutyrate concentrations ([ $\beta$ HB]) are presented in response  
592 to ingestion of ketone ester (KE) or placebo (PL) supplements during experimental sessions  
593 including a night (dark grey zone) either in normoxia ( $N_{PL}$ , black, open circles) or at a  
594 simulated altitude of 3,000m (grey dotted zone;  $H_{PL}$ , black and  $H_{KE}$ , red full circles). Blood  
595 [ $\beta$ HB] was assessed at baseline, 30min after the morning endurance training ( $ET_{120'}$ ; +5.5h)  
596 and the afternoon high intensity interval training ( $HIIT_{80'}$ ; +9h), as well as after 2h in  
597 hypoxia/normoxia (+11h), immediately before sleep (+13h) and upon waking up (+23h).  
598 Mean (line)  $\pm$  SD (whiskers), as well as individual values are shown for  $n = 11$ . §,  $p < 0.05$  vs.  
599  $N_{PL}$ ; #,  $p < 0.05$  vs. baseline for indicated condition.

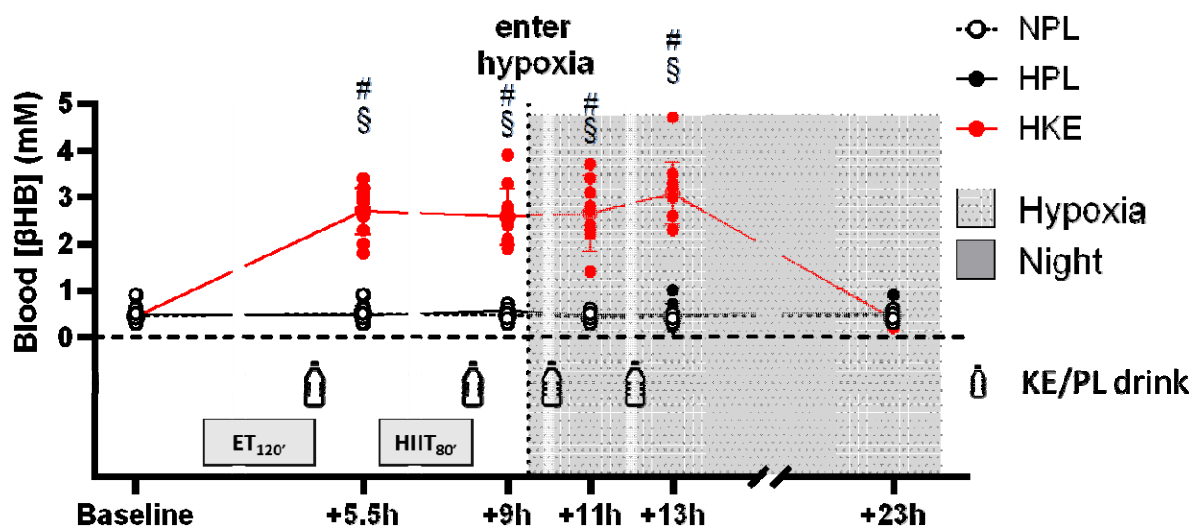

600

601

602 **Figure 3.** Data of polysomnographic (PSG) recordings are shown for participants that  
603 completed three experimental sessions in which they received either ketone ester (KE) or  
604 placebo (PL) supplements. They spent the night either in normoxia (N<sub>PL</sub>) or at a simulated  
605 altitude of 3,000m (H<sub>PL</sub> and H<sub>KE</sub>). During the night, participants' sleep was recorded using  
606 polysomnography (PSG). Mean (bar plots)  $\pm$  SD (whiskers), as well as individual values are  
607 shown for a) sleep efficiency, b) wakefulness after sleep onset (WASO), c) the amount (#) of  
608 arousals per night, and d) sleep onset latency (SOL). Moreover, sleep stage durations are  
609 shown for e) slow wave sleep (SWS), f) N1 phase, g) N2 phase, and h) rapid eye movement  
610 (REM) sleep. Data are reported for 11 participants and datapoints are connected within each  
611 participant. §,  $p < 0.05$  vs. N<sub>PL</sub>.

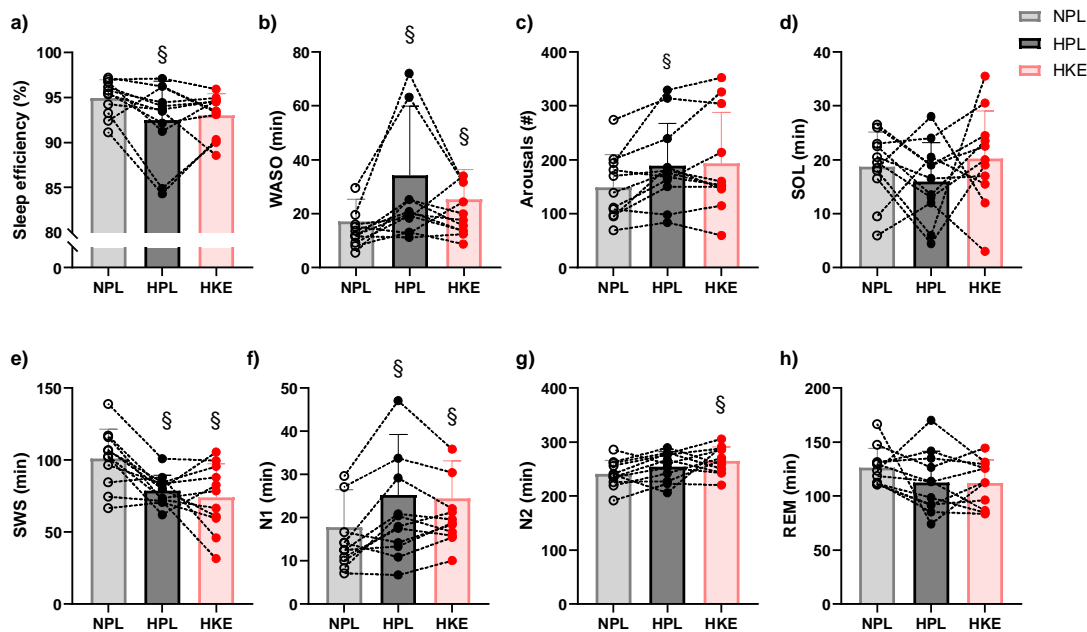

612



613 **Figure 4.** Nocturnal measurements of blood oxygen saturation ( $SpO_2$ ) and heart rate  
 614 (HR) are shown for participants that completed three experimental sessions in which they  
 615 received either ketone ester (KE) or placebo (PL) supplements. They spent the night either in  
 616 normoxia ( $N_{PL}$ ) or at a simulated altitude of 3,000m ( $H_{PL}$  and  $H_{KE}$ ). Mean (circles)  $\pm$  SD  
 617 (whiskers) are shown for a)  $SpO_2$  throughout the percentual duration of the night (%). Mean  
 618 (bar plots)  $\pm$  SD (whiskers), as well as individual values are shown for b) average and c)  
 619 minimal nocturnal  $SpO_2$  and d) coefficient of variance of  $SpO_2$  per hour of the night, as well as  
 620 e) average and f) minimal nocturnal HR. Data are reported for 11 participants and individual  
 621 values are connected within each participant. §,  $p < 0.05$  vs.  $N_{PL}$ ; #,  $p < 0.05$  vs. baseline; ##,  
 622  $p < 0.05$  vs. baseline for  $H_{PL}$  and  $H_{KE}$ ; \*,  $p < 0.05$  for  $H_{KE}$  vs.  $H_{PL}$ .

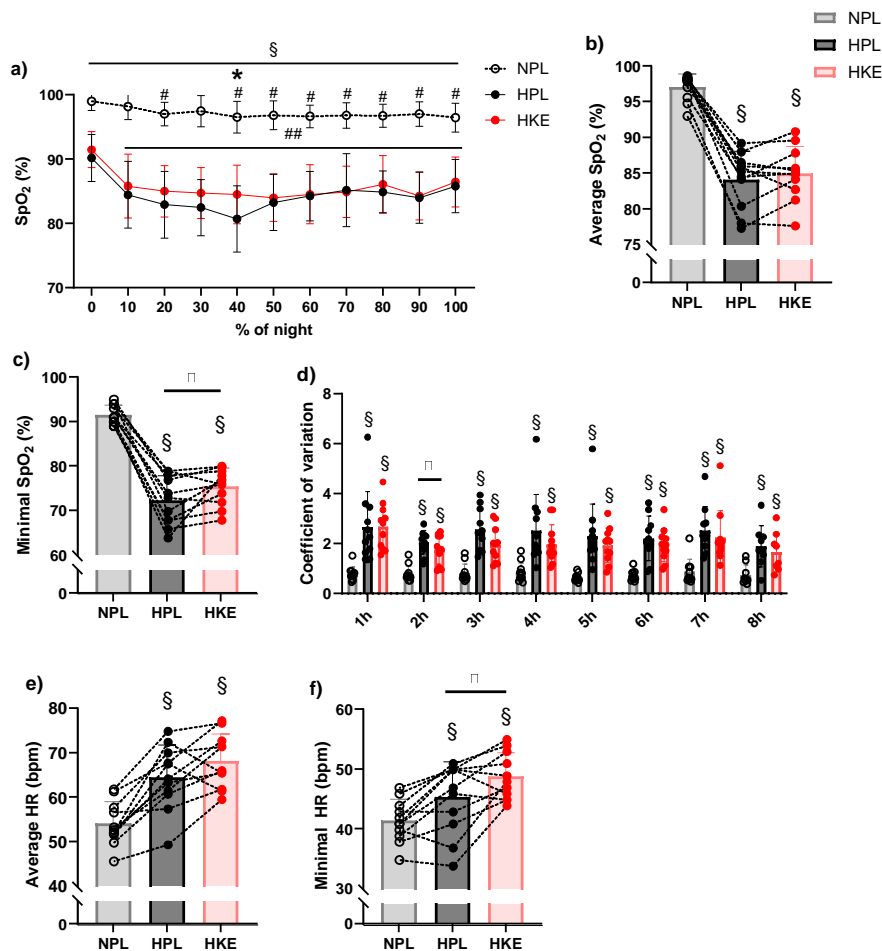

624 **Figure 5.** Exercise performance and heart rate data are shown for participants that  
625 completed three experimental sessions in which they received either ketone ester (KE) or  
626 placebo (PL) supplements during the first day. After spending the night in either in normoxia  
627 ( $N_{PL}$ ) or at a simulated altitude of 3,000m ( $H_{PL}$  and  $H_{KE}$ ), exercise performance was assessed  
628 by an all-out 30-min time trial ( $TT_{30'}$ ). Mean (bar plots)  $\pm$  SD (a, c, d, whiskers) or mean  
629 (horizontal indication)  $\pm$  95% confidence intervals (b, whiskers), as well as individual values  
630 are shown for a) mean power output, b) the individual differences in mean power output  
631 between all experimental conditions and c) average heart rate (HR) during  $TT_{30'}$  and d) HR  
632 after 5min of passive recovery. Data are reported for 11 participants and individual values are  
633 connected within each participant §,  $p < 0.05$  vs.  $N_{PL}$ .

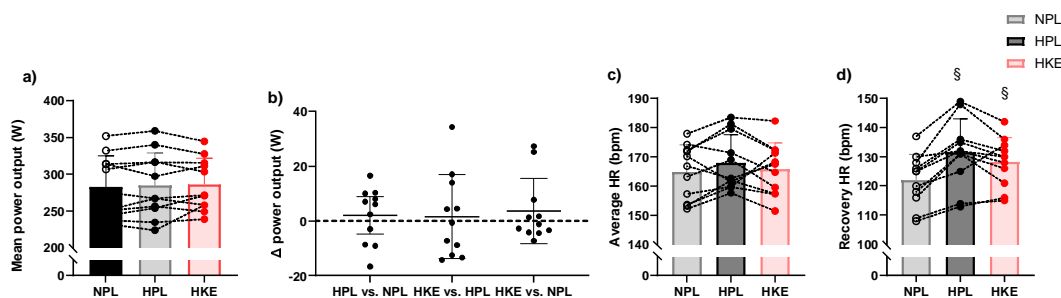

634

635 **REFERENCES**

- 636 1. **Levine BD, Stray-Gundersen J.** “Living high-training low”: Effect of moderate-  
637 altitude acclimatization with low-altitude training on performance. *J Appl Physiol* 83:  
638 102–112, 1997. doi: 10.1152/jappl.1997.83.1.102.
- 639 2. **Hoshikawa M, Uchida S, Sugo T, Kumai Y, Hanai Y, Kawahara T.** Changes in  
640 sleep quality of athletes under normobaric hypoxia equivalent to 2,000-m altitude: A  
641 polysomnographic study. *J Appl Physiol* 103: 2005–2011, 2007. doi:  
642 10.1152/jappphysiol.00315.2007.
- 643 3. **Mizuno K, Asano K, Okudaira N.** Sleep and Respiration under Acute Hypobaric  
644 Hypoxia. *Jpn. J. Physiol.* 43: 161–175, 1993.
- 645 4. **Pedlar C, Whyte G, Emegbo S, Stanley N, Hindmarch I, Godfrey R.** Acute sleep  
646 responses in a normobaric hypoxic tent. *Med Sci Sports Exerc* 37: 1075–1079, 2005.  
647 doi: 10.1249/01.mss.0000171623.52757.0f.
- 648 5. **Reite M, Jackson D, Cahoon RL, Weil J V.** Sleep physiology at high altitude.  
649 *Electroencephalogr Clin Neurophysiol* 38: 463–471, 1975.
- 650 6. **Selvamurthy W, Raju VRK, Ranganathan S, Hegde KS, Ray US.** Sleep patterns at  
651 an altitude of 3500 metres. *Int J Biometeorol* 30: 123–135, 1986. doi:  
652 10.1007/BF02189452.
- 653 7. **Zieliński J, Koziej M, Mańkowski M, Sarybaev AS, Tursalieva JS, Sabirov IS,**  
654 **Karamuratov AS, Mirrakhimov MM.** The quality of sleep and periodic breathing in  
655 healthy subjects at an altitude of 3200 m. *High Alt Med Biol* 1: 331–336, 2000. doi:  
656 10.1089/15270290050502408.
- 657 8. **Berssenbrugge BYA, Dempsey J, Iber C, Skatrud J, Wilson P.** Mechanisms of

- 658 Hypoxia-Induced Periodic Breathing During Sleep In Humans. *J Physiol* 343: 507–  
659 524, 1983.
- 660 9. **De Aquino Lemos V, Antunes HKM, Dos Santos RVT, Lira FS, Tufik S, De Mello**  
661 **MT.** High altitude exposure impairs sleep patterns, mood, and cognitive functions.  
662 *Psychophysiology* 49: 1298–1306, 2012. doi: 10.1111/j.1469-8986.2012.01411.x.
- 663 10. **Finnegan TP, Abraham P, Docherty TB.** Ambulatory monitoring of the  
664 electroencephalogram in high altitude mountaineers. *Electroencephalogr Clin*  
665 *Neurophysiol* 60: 220–224, 1985. doi: 10.1016/0013-4694(85)90034-3.
- 666 11. **Kinsman TA, Gore CJ, Hahn AG, Hopkins WC, Hawley JA, McKenna MJ, Clark**  
667 **SA, Aughey RJ, Townsend NE, Chow CM.** Sleep in athletes undertaking protocols of  
668 exposure to nocturnal simulated altitude at 2650 m. *J Sci Med Sport* 8: 222–232, 2005.  
669 doi: 10.1016/S1440-2440(05)80013-1.
- 670 12. **Normand H, Barragan M, Benoit O, Bailliart O, Raynaud J.** Periodic breathing and  
671 O<sub>2</sub> saturation in relation to sleep stages at high altitude. *Aviat Sp Environ Med* 61:  
672 229–235, 1990.
- 673 13. **Latshang TD, Lo Cascio CM, Stöwhas A-C, Grimm M, Stadelmann K, Tesler N,**  
674 **Achermann P, Huber R, Kohler M, Bloch KE.** Are Nocturnal Breathing, Sleep, and  
675 Cognitive Performance Impaired at Moderate Altitude (1630-2590 m)? *Sleep* 36:  
676 1969–1976, 2013.
- 677 14. **Mougin F, Simon-Rigaud ML, Davenne D, Renaud A, Garnier A, Kantelip JP,**  
678 **Magnin P.** Effects of sleep disturbances on subsequent physical performance. *Eur J*  
679 *Appl Physiol Occup Physiol* 63: 77–82, 1991. doi: 10.1007/BF00235173.
- 680 15. **Saner NJ, Lee MJC, Pitchford NW, Kuang J, Roach GD, Garnham A, Stokes T,**

- 681       **Phillips SM, Bishop DJ, Bartlett JD.** The effect of sleep restriction, with or without  
682       high-intensity interval exercise, on myofibrillar protein synthesis in healthy young  
683       men. *J Physiol* 598: 1523–1536, 2020. doi: 10.1113/JP278828.
- 684   16.   **Saner NJ, Lee MJC, Kuang J, Pitchford NW, Roach GD, Garnham A, Genders**  
685       **AJ, Stokes T, Schroder EA, Huo Z, Esser KA, Phillips SM, Bishop DJ, Bartlett**  
686       **JD.** Exercise mitigates sleep-loss-induced changes in glucose tolerance, mitochondrial  
687       function, sarcoplasmic protein synthesis, and diurnal rhythms. *Mol Metab* 43: 101110,  
688       2021. doi: 10.1016/j.molmet.2020.101110.
- 689   17.   **Sweeney EL, Peart DJ, Kyza I, Harkes T, Ellis JG, Walshe IH.** Impaired insulin  
690       profiles following a single night of sleep restriction: The impact of acute sprint interval  
691       exercise. *Int J Sport Nutr Exerc Metab* 30: 139–144, 2020. doi:  
692       10.1123/IJSNEM.2019-0235.
- 693   18.   **Reilly T, Edwards B.** Altered sleep-wake cycles and physical performance in athletes.  
694       *Physiol Behav* 90: 274–284, 2007. doi: 10.1016/j.physbeh.2006.09.017.
- 695   19.   **Chase JD, Roberson PA, Saunders MJ, Hargens TA, Womack CJ, Luden ND.**  
696       One night of sleep restriction following heavy exercise impairs 3-km cycling time-trial  
697       performance in the morning. *Appl Physiol Nutr Metab* 42: 909–915, 2017. doi:  
698       10.1139/apnm-2016-0698.
- 699   20.   **Dean B, Hartmann T, Wingfield G, Larsen P, Skein M.** Sleep restriction between  
700       consecutive days of exercise impairs sprint and endurance cycling performance. *J Sleep*  
701       *Res* 32: 1–9, 2023. doi: 10.1111/jsr.13857.
- 702   21.   **Nussbaumer-Ochsner Y, Ursprung J, Siebenmann C, Maggiorini M, Bloch KE.**  
703       Effect of short-term acclimatization to high altitude on sleep and nocturnal breathing.

- 704 *Sleep* 35: 419–423, 2012. doi: 10.5665/sleep.1708.
- 705 22. **Weil J V.** Sleep at high altitude. *High Alt Med Biol* 5: 180–189, 2004. doi:  
706 10.1089/1527029041352162.
- 707 23. **Stalmans M, Tominec D, Lauriks W, Robberechts R, Poffé C.** Exogenous ketosis  
708 attenuates acute mountain sickness and mitigates high-altitude hypoxemia [Online].  
709 <https://doi.org/10.1101/2023.11.21.23298762>.
- 710 24. **Poffé C, Robberechts R, Podlogar T, Kusters M, Debevec T, Hespel P.** Exogenous  
711 ketosis increases blood and muscle oxygenation but not performance during exercise in  
712 hypoxia. *Am J Physiol Integr Comp Physiol* 321: R844–R857, 2021. doi:  
713 10.1152/ajpregu.00198.2021.
- 714 25. **Robberechts R, Albouy G, Hespel P, Poffé C.** Exogenous Ketosis Improves Sleep  
715 Efficiency and Counteracts the Decline in REM Sleep after Strenuous Exercise. *Med*  
716 *Sci Sports Exerc* 55: 2064–2074, 2023. doi: 10.1249/MSS.0000000000003231.
- 717 26. **Poffé C, Ramaekers M, Bogaerts S, Hespel P.** Bicarbonate Unlocks the Ergogenic  
718 Action of Ketone Monoester Intake in Endurance Exercise. *Med Sci Sports Exerc* 53:  
719 431–441, 2020. doi: 10.1249/MSS.0000000000002467.
- 720 27. **Poffé C, Wyns F, Ramaekers M, Hespel P.** Exogenous Ketosis Impairs 30-min Time-  
721 Trial Performance Independent of Bicarbonate Supplementation. *Med Sci Sports Exerc*  
722 53: 1068–1078, 2020. doi: 10.1249/MSS.0000000000002552.
- 723 28. **Nicolas J, King BR, Levesque D, Lazzouni L, Coffey E, Swinnen S, Doyon J,**  
724 **Carrier J, Albouy G.** Sigma oscillations protect or reinstate motor memory depending  
725 on their temporal coordination with slow waves. *Elife* 11: 1–26, 2022. doi:  
726 10.7554/eLife.73930.

- 727 29. **von Czettritz G, Bax RT, Eckardt T, Springer S, Emmrich P.** [Periodic breathing  
728 with periodic oxygen variation in infancy]. *Wien Med Wochenschr* 146: 317–319,  
729 1996.
- 730 30. **Razi NM, DeLauter M, Pandit PB.** Periodic breathing and oxygen saturation in  
731 preterm infants at discharge. *J Perinatol* 22: 442–444, 2002. doi:  
732 10.1038/sj.jp.7210762.
- 733 31. **Salvaggio A, Insalaco G, Marrone O, Romano S, Braghiroli A, Lanfranchi P,**  
734 **Patruno V, Donner CF, Bonsignore G.** Effects of high-altitude periodic breathing on  
735 sleep and arterial oxyhaemoglobin saturation. *Eur Respir J* 12: 408–413, 1998. doi:  
736 10.1183/09031936.98.12020408.
- 737 32. **Imai K, Sato H, Hori M, Kusuoka H, Ozaki H, Yokoyama H, Takeda H, Inoue M,**  
738 **Kamada T.** Vagally mediated heart rate recovery after exercise is accelerated in  
739 athletes but blunted in patients with chronic heart failure. *J Am Coll Cardiol* 24: 1529–  
740 1535, 1994. doi: 10.1016/0735-1097(94)90150-3.
- 741 33. **Cole CR, Blackstone EH, Pashkow FJ, Snader CE, Lauer MS.** Heart Rate  
742 Recovery Immediately After Exercise as a Predictor of Mortality. *J Cardiopulm*  
743 *Rehabil* 20: 131–132, 2000. doi: 10.1097/00008483-200003000-00012.
- 744 34. **Peçanha T, Silva-Júnior ND, Forjaz CL de M.** Heart rate recovery: Autonomic  
745 determinants, methods of assessment and association with mortality and cardiovascular  
746 diseases. *Clin Physiol Funct Imaging* 34: 327–339, 2014. doi: 10.1111/cpf.12102.
- 747 35. **Lamberts RP, Swart J, Capostagno B, Noakes TD, Lambert MI.** Heart rate  
748 recovery as a guide to monitor fatigue and predict changes in performance parameters.  
749 *Scand J Med Sci Sport* 20: 449–457, 2010. doi: 10.1111/j.1600-0838.2009.00977.x.

- 750 36. **Tasali E, Leproult R, Ehrmann DA, Van Cauter E.** Slow-wave sleep and the risk of  
751 type 2 diabetes in humans. *Proc Natl Acad Sci U S A* 105: 1044–1049, 2008. doi:  
752 10.1073/pnas.0706446105.
- 753 37. **Huwiler S, Carro-Domínguez M, Stich F, Sala R, Aziri F, Trippel A, Ryf T,**  
754 **Markendorf S, Niederseer D, Bohm P, Stoll G, Laubscher L, Thevan J, Spengler**  
755 **CM, Gawinecka J, Osto E, Huber R, Wenderoth N, Schmied C, Lustenberger C.**  
756 Slow waves during deep sleep support cardiac function. *Curr Issues Sport Sci* 9: 4,  
757 2024. doi: 10.36950/2024.2ciss004.
- 758 38. **Alessandrelli G, Huwiler S, Bernardi G, Carro-domínguez M, Stich F.**  
759 Cardiovascular responses to natural and auditory evoked slow waves predict post-sleep  
760 cardiac function. .
- 761 39. **Hallböök T, Lundgren J, Rosén I.** Ketogenic diet improves sleep quality in children  
762 with therapy-resistant epilepsy. *Epilepsia* 48: 59–65, 2007. doi: 10.1111/j.1528-  
763 1167.2006.00834.x.
- 764 40. **Sadak U, Honrath P, Ermis U, Heckelmann J, Meyer T, Weber Y, Wolking S.**  
765 Reduced REM sleep: a potential biomarker for epilepsy – a retrospective case-control  
766 study. *Seizure* 98: 27–33, 2022. doi: 10.1016/j.seizure.2022.03.022.
- 767 41. **Church WH, Adams RE, Wyss LS.** Ketogenic diet alters dopaminergic activity in the  
768 mouse cortex. *Neurosci Lett* 571: 1–4, 2014. doi: 10.1016/j.neulet.2014.04.016.
- 769 42. **Robberechts R, Poffé C.** Defining ketone supplementation: the evolving evidence for  
770 post-exercise ketone supplementation to improve recovery and adaptation to exercise.  
771 *Am J Physiol Physiol* , 2023. doi: 10.1152/ajpcell.00485.2023.
- 772 43. **Hasegawa E, Miyasaka A, Sakurai K, Cherasse Y, Li Y, Sakurai T.** Rapid eye



- 773 movement sleep is initiated by basolateral amygdala dopamine signaling in mice.  
774 *Science* (80- ) 375: 994–1000, 2022. doi: 10.1126/science.abl6618.
- 775 44. **West JB, Peters RM, Aksnes G, Maret KH, Milledge JS, Schoene RB.** Nocturnal  
776 periodic breathing at altitudes of 6,300 and 8,050 m. *J Appl Physiol* 61: 280–287, 1986.  
777 doi: 10.1152/jappl.1986.61.1.280.
- 778 45. **Bernardi L, Passino C, Spadacini G, Calciati A, Robergs R, Greene R, Martignoni**  
779 **E, Anand I, Appenzeller O.** Cardiovascular autonomic modulation and activity of  
780 carotid baroreceptors at altitude. *Clin Sci* 95: 565–573, 1998. doi: 10.1042/cs0950565.
- 781 46. **Guyenet PG.** Neural structures that mediate sympathoexcitation during hypoxia.  
782 *Respir Physiol* 121: 147–162, 2000. doi: 10.1016/S0034-5687(00)00125-0.
- 783 47. **Novak V, Novak P, De Champlain, J, Le Blanc R, Martin R, Nadeau R.** Influence  
784 of Respiration on Heart Rate and Blood Pressure Fluctuations. *J Physiol* 74: 617–626,  
785 1993. doi: 10.1201/b15277-5.
- 786 48. **Brown TE, Beightol LA, Koh J, Eckberg DL.** Important influence of respiration on  
787 human R-R interval power spectra is largely ignored. *J Appl Physiol* 75: 2310–2317,  
788 1993. doi: 10.1152/jappl.1993.75.5.2310.
- 789 49. **Morales JF, Deviaene M, Milagro J, Testelmans D, Buyse B, Willems R, Orini M,**  
790 **Van Huffel S, Bailon R, Varon C.** Evaluation of Methods to Characterize the Change  
791 of the Respiratory Sinus Arrhythmia with Age in Sleep Apnea Patients. .
- 792 50. **Brandenberger G, Ehrhart J, Piquard F, Simon C.** Inverse coupling between  
793 ultradian oscillations in delta wave activity and heart rate variability during sleep. *Clin*  
794 *Neurophysiol* 112: 992–996, 2001. doi: 10.1016/S1388-2457(01)00507-7.

- 795 51. **Somers VK, Dyken ME, Mark AL, Abboud FM.** Sympathetic-Nerve Activity  
796 During Sleep in Normal Subjects. *N Engl J Med* 328: 303–307, 1993.
- 797 52. **Kolanowski J, Young JB, Landsberg L.** Stimulatory influence of d(-)3-  
798 hydroxybutyrate feeding on sympathetic nervous system activity in the rat. *Metabolism*  
799 43: 180–185, 1994.
- 800 53. **Robberechts R, Poffé C, Hespel P.** Exogenous ketosis suppresses diuresis and atrial  
801 natriuretic peptide during exercise. *J Appl Physiol* : 449–460, 2022. doi:  
802 10.1152/jappphysiol.00061.2022.
- 803
- 804
